# Supplementary material
Source: publisher figshare collection journal article supplement (https://tandf.figshare.com/ndownloader/files/15630464)
Supplement: Supplementary file 1 [file 15630464]

**Supplementary Materials**

Supplementary Table 1. Accession data for sequences used in MEME analysis. Included data are the species name, the accession, and database from which the sequence was acquired. * denotes a species for which two sequences were acquired from the same species and/or accession. Two sequences were *Dichroa febrifuga* from OneKP and two *Marshallia mohrii* sequences (M20r and M21r, which relate to *Mm*CRF1 GenBank accession MF687408) were used.

| Species | Accession/ID | Database |
| --- | --- | --- |
| *Cornus florida* | BFJL | OneKP |
| **Dichroa febrifuga* | QURC | OneKP |
| *Actinidia chinensis* | AONS01002249 | GenBank |
| *Actinidia chinensis* | AONS01013141 | GenBank |
| *Campotheca acuminata* | GACF01001038 | GenBank |
| *Souroubea exauriculata* | BNTL | OneKP |
| *Ternstroemia gymnanthera* | NGRR | OneKP |
| *Galax urceolata* | PIYM | OneKP |
| *Galax urceolata* | ADHK | OneKP |
| *Gentiana acaulis* | ECTD | OneKP |
| *Rauvolfia serpentina* | GACE01093389 | GenBank |
| *Catharanthus roseus* | GACD01031032 | GenBank |
| *Saintpaulia ionantha* | RWKR | OneKP |
| *Antirrhinum braun-blanquetii* | YRHD | OneKP |
| *Anisacanthus quadrifidas* | PCGJ | OneKP |
| *Sesamum indicum* | JP647111 | GenBank |
| *Verbascum sp.* | XXYA | OneKP |
| *Kigelia africana* | XAYK | OneKP |
| *Solanum ptychanthum* | DLJZ | OneKP |
| *Solanum tuberosum* | EG012952 | GenBank |
| *Solanum phureja* | GS551822 | GenBank |
| *Solanum lycopersicum* | *Sl*CRF5 | SolGenomics |
| *Lycium barbarum* | LWCK | OneKP |
| *Lycium sp.* | OSMU | OneKP |
| *Atropa belladonna* | BOLZ | OneKP |
| *Nicotiana tabacum* | FH358498 | GenBank |
| *Pittosporum resiniferum* | SALZ | OneKP |
| *Centella asiatica* | WEQK | OneKP |
| *Hedera helix* | SUVN | OneKP |
| *Hedera helix* | JBYE | OneKP |
| *Hedera helix* | EITK | OneKP |
| *Panax ginseng* | JI152499 | GenBank |
| *Panax ginseng* | GAAG01052560 | GenBank |
| *Griselinia racemosa* | QIKZ | OneKP |
| *Helenium autumnale* | DUNJ | OneKP |
| *Erigeron speciosus* | DESP | OneKP |
| *Lactuca sativa* | JI603844 | GenBank |
| *Lactuca sativa* | AFSA01058599 | GenBank |
| *Conyza canadensis* | GCA_000775935.1 | GenBank |
| *Conyza canadensis* | NUSE | OneKP |
| *Conyza canadensis* | WSYE | OneKP |
| **Marshallia mohrii* | M20r, M21r; MF687408 | GenBank |
| *Artemesia annua* | EZ200862 | GenBank |
| *Lonicera japonica* | GAAY01009209 | GenBank |
| *Platycodon grandiflorus* | IHPC | OneKP |
| *Viburnum odoratissimum* | HLJG | OneKP |
| *Symphoricarpos sp.* | CAQZ | OneKP |
| *Oncotheca balansae* | PVGM | OneKP |
